# Supplementary material
Source: publisher figshare collection journal article supplement (https://sage.figshare.com/ndownloader/files/17477372)
Supplement: Supplementary file 1 [file 17477372]

## Sheet: Marked.Missing.Fake News and Mi
List of 2008-2017 articles on Fake News and Misinformation
Article Number (e.g., M1, F2)	Type	Full Reference of the article (in APA style) copy and paste from Google Scholar	Publication Year (e.g, 2008)	Journal Title	Abstract of the article (copy and paste)
F18	Fake News	Lewis, S. C. (2008). Where young adults intend to get news in five years. Newspaper Research Journal, 29(4), 36-52.	2008	Newspaper Research Journal	A survey of students at two universities found that young adults expect that five years from now they will get less of their news and information from social networking sites and more from older media, including print newspapers.
F23	Fake News	Coe, K., Tewksbury, D., Bond, B. J., Drogos, K. L., Porter, R. W., Yahn, A., & Zhang, Y. (2008). Hostile news: Partisan use and perceptions of cable news programming. Journal of Communication, 58(2), 201-219.	2008	Journal of Communication	Two trends have marked the development of U.S. cable television news in recent years: a blurring of hard and soft news and an increase in overt partisanship. This paper reports the results of 2 studies that provide insight into the nature and impact of these trends. The first study analyzes national survey data to identify the factors that lead political partisans to choose particular cable telev…
F30	Fake News	Achter, P. (2008). Comedy in unfunny times: News parody and carnival after 9/11. Critical Studies in Media Communication, 25(3), 274-303.	2008	Critical Studies in Media Communication	Comedy has a special role in helping societies manage crisis moments, and the U.S. media paid considerable attention to the proper role of comedy in public culture after the 9/11 tragedies. As has been well documented, many popular U.S. comic voices were paralyzed in trying to respond to 9/11 or disciplined by audiences when they did. Starting with these obstacles in mind, this essay analyzes ear…
F39	Fake News	Feldman, L., & Young, D. G. (2008). Late-night comedy as a gateway to traditional news: An analysis of time trends in news attention among late-night comedy viewers during the 2004 presidential primaries. Political Communication, 25(4), 401-422.	2008	Political Communication	Recent reports published by the Pew Research Center for the People and the Press (2000 Pew Research Center for the People and the Press. (2000). Audiences fragmented and skeptical: The tough job of communicating with voters , 2004 Pew Research Center for the People and the Press. (2004). Cable and Internet loom large in fragmented political news universe. ) propose that young audiences are abando…
F43	Fake News	Wood, M. L., Nelson, M. R., Atkinson, L., & Lane, J. B. (2008). Social utility theory: Guiding labeling of VNRs as ethical and effective public relations. Journal of Public Relations Research, 20(2), 231-249.	2008	Journal of Public Relations Research	Social utility theory suggests that labeling video news release (VNR) source material is the ethical decision (Wulfemeyer & Frazier, 1992), yet the persuasion knowledge model predicts that the effectiveness of VNRs will decrease as people become aware of this PR tactic (Friestad & Wright, 1994). Our study found that positive and negative effects were heightened when subjects read about VNRs and v…
M11	Misinformation	Hope, L., Ost, J., Gabbert, F., Healey, S., & Lenton, E. (2008). “With a little help from my friends…”: The role of co-witness relationship in susceptibility to misinformation. Acta Psychologica, 127(2), 476-484.	2008	Acta Psychologica	Inaccuracies in eyewitness accounts can occur when witnesses are exposed to post-event misinformation via discussion with a cowitness. The current study examined the role of co-witness relationship by comparing the memory performance of pairs of romantic couples, friends and previously unacquainted strangers with that of individuals. Ninety-six participants viewed an event and then discussed the …
M26	Misinformation	Paz-Alonso, P. M., & Goodman, G. S. (2008). Trauma and memory: Effects of post-event misinformation, retrieval order, and retention interval. Memory, 16(1), 58-75.	2008	Memory	The present study concerned effects of misinformation, retrieval order, and retention interval on eyewitness memory for a traumatic event (a vivid murder). Relations between misinformation acceptance and compliance were also examined. The classic three-stage misinformation paradigm (Loftus, 1979) was employed, with a multi-component recognition test added. Either immediately or 2weeks after viewi…
M33	Misinformation	Tobin, H. J. (2008). Confronting Misinformation on Abortion: Informed Consent, Deference, and Fetal Pain Laws. Colum. J. Gender & L., 17, 111.	2008	Columbia Journal of Gender and Law	no abstract
M43	Misinformation	Skagerberg, E. M., & Wright, D. B. (2008). The co-witness misinformation effect: Memory blends or memory compliance?. Memory, 16(4), 436-442.	2008	Memory	For 30 years hundreds of researchers have shown participants videos and slide-sequences of events, presented the participants with misleading information, and found that this misinformation distorted their memories. The purpose of this study was to establish whether those misled participants are reporting a memory blend of the two sources of information or whether they are simply complying with t…
M72	Misinformation	Bednar, P. M., & Welch, C. (2008). Bias, Misinformation and the Paradox of Neutrality. Informing Science, 11.	2008	Informing Science: The International Journal of an Emerging Transdiscipline	What is normally described as bias? A possible definition comprises attempts to distort or mislead to achieve a certain perspective, i.e. subjective descriptions intended to mislead. If designers were able to exclude bias from informing systems, then this would maximize their effectiveness. This implicit conjecture appears to underpin much of the research in our field. However, in our efforts to …
M8	Misinformation	Ecker, U. K., Lewandowsky, S., & Tang, D. T. (2010). Explicit warnings reduce but do not eliminate the continued influence of misinformation. Memory & cognition, 38(8), 1087-1100.	2008	Memory and Cognition	Information that initially is presumed to be correct, but that is later retracted or corrected, often continues to influence memory and reasoning. This occurs even if the retraction itself is well remembered. The present study investigated whether the continued influence of misinformation can be reduced by explicitly warning people at the outset that they may be misled. A specific warning— giving…
F10	Fake News	Colletta, L. (2009). Political satire and postmodern irony in the age of Stephen Colbert and Jon Stewart. The Journal of Popular Culture, 42(5), 856-874.	2009	The Journal of Popular Culture	no abstract
F21	Fake News	Carlson, M. (2009). THE REALITY OF A FAKE IMAGE News norms, photojournalistic craft, and Brian Walski's fabricated photograph. Journalism Practice, 3(2), 125-139.	2009	Journalism Practice	A few weeks into the start of the Iraq War in 2003, the front page of the Los Angeles Times featured a large photograph depicting a dramatic scene in which a British soldier motions to Iraqi civilians to stay down while a father carrying a child creeps across the dirt. The image ran in several US newspapers before it was discovered to be a composite of two different images cobbled together by the…
F25	Fake News	Tenenboim-Weinblatt, K. (2009). Jester, fake journalist, or the new Walter Lippmann? Recognition processes of Jon Stewart by the US journalistic community. International Journal of Communication, 3, 24.	2009	International Journal of Communication	How does the journalistic community negotiate its identity, boundaries, and authority in relation to individuals and cultural forms that challenge the definitions of who is a journalist and what constitutes journalism? And how does it do so against the background of a growing academic validation of these alternative news venues? This study focuses on the figure of Jon Stewart, host of Comedy Cent…
F31	Fake News	Walgrave, S., Lefevere, J., & Nuytemans, M. (2009). Issue ownership stability and change: How political parties claim and maintain issues through media appearances. Political Communication, 26(2), 153-172.	2009	Political Communication	Drawing on a large-scale online experiment embedded in an electoral survey in Belgium, this study tests whether issue ownership is, rather than a stable condition, a dynamic process that can be manipulated by an experimental stimulus. Five thousand subjects were confronted with an embedded fake TV-news item in which the five leaders of the main Belgian parties offered their parties' stance on six…
M27	Misinformation	Parker, A., Buckley, S., & Dagnall, N. (2009). Reduced misinformation effects following saccadic bilateral eye movements. Brain and Cognition, 69(1), 89-97.	2009	Brain and Cognition	The effects of saccadic bilateral (horizontal) eye movements on memory for a visual event narrative were investigated. In the study phase, participants were exposed to a set of pictures accompanied by a verbal commentary describing the events depicted in the pictures. Next, the participants were asked either misleading or control questions about the depicted event and were then asked to engage in…
M40	Misinformation	Luna, K., & Migueles, M. (2009). Acceptance and confidence of central and peripheral misinformation. The Spanish Journal of Psychology, 12(2), 405-413.	2009	The Spanish Journal of Psychology	We examined the memory for central and peripheral information concerning a crime and the acceptance of false information. We also studied eyewitnesses' confidence in their memory. Participants were shown a video depicting a bank robbery and a questionnaire was used to introduce false central and peripheral information. The next day the participants completed a recognition task in which they rated…
M5	Misinformation	Landefeld, C. S., & Steinman, M. A. (2009). The Neurontin legacy--marketing through misinformation and manipulation. New England Journal of Medicine, 360(2), 103	2009	New England Journal of Medicine	no abstract
F15	Fake News	Meddaugh, P. M. (2010). Bakhtin, Colbert, and the center of discourse: Is there no “truthiness” in humor?. Critical Studies in Media Communication, 27(4), 376-390.	2010	Critical Studies in Media Communication	The Colbert Report, a contemporary appropriation of the carnivalesque, is a potent agent in bearing witness to shortcomings of the political realm. Colbert as carnival challenges authoritative claims to the ‘‘center’’ of discourse*in this context, official knowledge distributed by traditional news venues and information practices. Carnival laughter positions audiences as insiders, in contrast to …
F26	Fake News	Jones, J. P., & Baym, G. (2010). A dialogue on satire news and the crisis of truth in postmodern political television. Journal of Communication Inquiry, 34(3), 278-294.	2010	Journal of Communication Inquiry	no abstract
F33	Fake News	Painter, C., & Hodges, L. (2010). Mocking the news: How The Daily Show with Jon Stewart holds traditional broadcast news accountable. Journal of Mass Media Ethics, 25(4), 257-274.	2010	Journal of Mass Media Ethics	The purpose of this study is to see how Jon Stewart and his Daily Show colleagues hold traditional broadcast media accountable. This paper suggests Stewart is holding those who claim they are practicing journalism accountable to the public they claim to serve and outlines the normative implications of that accountability. There is a journalistic norm that media practitioners, and the media as a w…
M10	Misinformation	Stark, C. E., Okado, Y., & Loftus, E. F. (2010). Imaging the reconstruction of true and false memories using sensory reactivation and the misinformation paradigms. Learning & Memory, 17(10), 485-488.	2010	Learning & Memory	Many current theories of false memories propose that, when we retrieve a memory, we are not reactivating a veridical, fixed representation of a past event, but are rather reactivating incomplete fragments that may be accurate or distorted and may have arisen from other events. By presenting the two phases of the misinformation paradigm in different modalities, we could observe sensory reactivatio…
M19	Misinformation	Malone, E. L., Dooley, J. J., & Bradbury, J. A. (2010). Moving from misinformation derived from public attitude surveys on carbon dioxide capture and storage towards realistic stakeholder involvement. International Journal of Greenhouse Gas Control, 4(2), 419-425.	2010	International Journal of Greenhouse Gas Control	Stakeholder involvement (SI) can include many activities, from providing information on a website to one-on-one conversations with people confronting an issue in their community. For carbon dioxide capture and storage (CCS), there are now quite a few surveys of public attitudes towards CCS that are being used to inform the design of SI efforts. These surveys, focused on the nascent commercial dep…
M2	Misinformation	Kata, A. (2010). A postmodern Pandora's box: anti-vaccination misinformation on the Internet. Vaccine, 28(7), 1709-1716.	2010	Vaccine	The Internet plays a large role in disseminating anti-vaccination information. This paper builds upon previous research by analyzing the arguments proffered on anti-vaccination websites, determining the extent of misinformation present, and examining discourses used to support vaccine objections. Arguments around the themes of safety and effectiveness, alternative medicine, civil liberties, consp…
M21	Misinformation	Chipeta, E. K., Chimwaza, W., & Kalilani-Phiri, L. (2010). Contraceptive knowledge, beliefs and attitudes in rural Malawi: misinformation, misbeliefs and misperceptions. Malawi Medical Journal, 22(2).	2010	Malawi Medical Journal	Introduction The objective of the study was to find out factors that affect the intentions of men and women to use family planning methods. Methods The study was conducted in Mangochi district, the southern region of Malawi in 2006. About 60 Focus group discussions were conducted to identify the attitudes and beliefs of 30 male and 30 female participants regarding family planning methods. The dat…
M22	Misinformation	Zhu, B., Chen, C., Loftus, E. F., Lin, C., He, Q., Chen, C., ... & Dong, Q. (2010). Individual differences in false memory from misinformation: Personality characteristics and their interactions with cognitive abilities. Personality and Individual Differences, 48(8), 889-894.	2010	Personality and Individual Differences	This research investigated the associations among personality characteristics, cognitive abilities, and false memory induced by misinformation. Chinese college students (N = 436) participated in a misinformation study and received a battery of cognitive tasks and personality measures. Results showed that false memory was positively related to persistence, self-directedness, and active coping, but…
M34	Misinformation	Porter, S., Bellhouse, S., McDougall, A., Ten Brinke, L., & Wilson, K. (2010). A prospective investigation of the vulnerability of memory for positive and negative emotional scenes to the misinformation effect. Canadian Journal of Behavioural Science/Revue canadienne des sciences du comportement, 42(1), 55.	2010	Canadian Journal of Behavioural Science	This study examined (prospectively) the impact of the emotional content of visual scenes on memory accuracy and susceptibility to misinformation over time. After viewing a highly positive and highly negative photographic image, half of participants (N = 80) were exposed to misinformation concerning the images and later responded to a series of questions about the details of each. After 1 week or …
M36	Misinformation	Glaeser, E. L., & Ujhelyi, G. (2010). Regulating misinformation. Journal of Public Economics, 94(3-4), 247-257.	2010	Journal of Public Economics	Governments have responded to misleading advertising by banning it, engaging in counter-advertising and taxing and regulating the product. In this paper, we consider the welfare effects of those different responses to misinformation. While misinformation lowers consumer surplus, its effect on social welfare is ambiguous. Misleading advertising leads to over-consumption but that may be offsetting …
M39	Misinformation	Bedford, D. (2010). Agnotology as a teaching tool: Learning climate science by studying misinformation. Journal of Geography, 109(4), 159-165	2010	Journal of Geography	Despite the existence of a clear scientific consensus about global warming, opinion surveys find confusion among the American public, regarding both scientific issues and the strength of the scientific consensus. Evidence increasingly points to misinformation as a contributing factor. This situation is both a challenge and an opportunity for science educators, including geographers. The direct st…
M6	Misinformation	Nyhan, B. (2010, January). Why the" death panel" myth wouldn't die: misinformation in the health care reform debate. In The Forum (Vol. 8, No. 1). De Gruyter.	2010	The Forum	Both Bill Clinton and Barack Obama struggled to overcome widespread and persistent myths about their proposals to reform the American health care system. Their difficulties highlight the influence of factual misinformation in national politics and the extent to which it correlates with citizens' political views. In this essay, I explain how greater elite polarization and the growth in media choic…
M7	Misinformation	Zhu, B., Chen, C., Loftus, E. F., Lin, C., He, Q., Chen, C.,Li, H., Xue, G., Lu, Z. & Dong, Q. (2010). Individual differences in false memory from misinformation: Cognitive factors. Memory, 18(5), 543-555.	2010	Memory	This research investigated the cognitive correlates of false memories that are induced by the misinformation paradigm. A large sample of Chinese college students (N_x0001_436) participated in a misinformation procedure and also took a battery of cognitive tests. Results revealed sizable and systematic individual differences in false memory arising from exposure to misinformation. False memories w…
M70	Misinformation	Baym, C. L., & Gonsalves, B. D. (2010). Comparison of neural activity that leads to true memories, false memories, and forgetting: An fMRI study of the misinformation effect. Cognitive, Affective, & Behavioral Neuroscience, 10(3), 339-348.	2010	Cognitive, Affective, & Behavioral Neuroscience	False memories can occur when people are exposed to misinformation about a past event. Of interest here are the neural mechanisms of this type of memory failure. In the present study, participants viewed photographic vignettes of common activities during an original event phase (OEP), while we monitored their brain activity using fMRI. Later, in a misinformation phase, participants viewed sentenc…
M76	Misinformation	Van Bergen, S., Horselenberg, R., Merckelbach, H., Jelicic, M., & Beckers, R. (2010). Memory distrust and acceptance of misinformation. Applied Cognitive Psychology, 24(6), 885-896.	2010	Applied Cognitive Psychology	Relying on a community sample (N = 80), the present study examined whether memory distrust is related to an increased tendency to accept misinformation and whether it interacts with passage of time. Participants were shown video footage of an armed robbery. Approximately 30 minutes later, they were asked to describe as accurately as possible what they had seen. Either 1 day or 2 weeks later they …
M9	Misinformation	Cogley, J. G., Kargel, J. S., Kaser, G., & van der Veen, C. J. (2010). Tracking the source of glacier misinformation. Science, 327(5965), 522-522.	2010	Science	no abstract
F19	Fake News	Beavers, S. L. (2011). Getting political science in on the joke: Using The Daily Show and other comedy to teach politics. PS: Political Science & Politics, 44(2), 415-419.	2011	PS: Political Science & Politics	The challenges of teaching introductory-level U.S. politics to reluctant audiences are well known and widely lamented. This article investigates the pedagogical potential of political satire, specifically The Daily Show with Jon Stewart, in engaging students in this tough-to-teach course. Based on a review of available literature and student survey data from the fall 2008 term, I argue that using…
F48	Fake News	Carvalho, C., Klagge, N., & Moench, E. (2011). The persistent effects of a false news shock. Journal of Empirical Finance, 18(4), 597-615.	2011	Journal of Empirical Finance	In September 2008, a six-year-old article about the 2002 bankruptcy of United Airlines' parent company resurfaced on the Internet and was mistakenly believed to be reporting a new bankruptcy filing by the company. This episode caused the company's stock price to drop by as much as 76% in just a few minutes, before NASDAQ halted trading. After the “news” had been identified as false, the stock pri…
M12	Misinformation	Ecker, U. K., Lewandowsky, S., Swire, B., & Chang, D. (2011). Correcting false information in memory: Manipulating the strength of misinformation encoding and its retraction. Psychonomic Bulletin & Review, 18(3), 570-578.	2011	Psychonomic Bulletin & Review	Information that is presumed to be true at encoding but later on turns out to be false (i.e., misinformation) often continues to influence memory and reasoning. In the present study, we investigated how the strength of encoding and the strength of a later retraction of the misinformation affect this continued influence effect. Participants read an event report containing misinformation and a subs…
M13	Misinformation	Vallano, J. P., & Compo, N. S. (2011). A comfortable witness is a good witness: Rapport‐building and susceptibility to misinformation in an investigative mock‐crime interview. Applied Cognitive Psychology, 25(6), 960-970.	2011	Applied Cognitive Psychology	Major investigative interviewing protocols such as the Cognitive Interview recommend that investigators build rapport with cooperative adult witnesses at the beginning of a police interview. Although research substantiates the benefits of rapport‐building on the accuracy of child witness reports, few studies have examined whether similar benefits apply to adult witnesses. The present study invest…
M20	Misinformation	French, L., Garry, M., & Mori, K. (2011). Relative–not absolute–judgments of credibility affect susceptibility to misinformation conveyed during discussion. Acta Psychologica, 136(1), 119-128.	2011	Acta Psychologica	People remember different details about the same events, and when they discuss events they exchange new – and misleading – information. Discussion can change memory, especially when the source of new information is highly credible. But we do not know whether the effects of credibility are based on absolute judgments – judging a source's credibility independently from our own credibility – or rela…
M3	Misinformation	MLA Frenda, Steven J., Rebecca M. Nichols, and Elizabeth F. Loftus. "Current issues and advances in misinformation research." Current Directions in Psychological Science 20.1 (2011): 20-23.	2011	Current Directions in Psychological Science	Eyewitnesses are often called upon to report information about what they have seen. A wealth of research from the past century has demonstrated, however, that eyewitness memory is malleable and vulnerable to distorting influences, including the effects of misinformation. In this article, we review recent developments in research related to the misinformation effect, including individual differenc…
M55	Misinformation	Rowlands, S. (2011). Misinformation on abortion. The European Journal of Contraception & Reproductive Health Care, 16(4), 233-240.	2011	The European Journal of Contraception and Reproductive Health Care	Objective To fi nd the latest and most accurate information on aspects of induced abortion. Methods A literature survey was carried out in which fi ve aspects of abortion were scrutinised: risk to life, risk of breast cancer, risk to mental health, risk to future fertility, and fetal pain. Findings Abortion is clearly safer than childbirth. There is no evidence of an association between abortion …
M56	Misinformation	Higham, P. A., Luna, K., & Bloomfield, J. (2011). Trace‐strength and source‐monitoring accounts of accuracy and metacognitive resolution in the misinformation paradigm. Applied Cognitive Psychology, 25(2), 324-335.	2011	Applied Cognitive Psychology	Two experiments are reported that investigate the impact of misinformation on memory accuracy and metacognitive resolution. In Experiment 1, participants viewed a series of photographs depicting a crime scene, were exposed to misinformation that contradicted details in the slides, and later took a recognition memory test. For each answer, participants were required to indicate whether they were w…
M57	Misinformation	Ankomah, A., Anyanti, J., & Oladosu, M. (2011). Myths, misinformation, and communication about family planning and contraceptive use in Nigeria. Journal of Contraception, 95-105.	2011	Journal of Contraception	Background: This paper examines myths, misinformation, factual information, and communication about family planning and their effects on contraceptive use in Nigeria. Methods: A nationally representative sample of 20,171 respondents from two waves of a multiround survey (one in 2003 and the other in 2005), was analyzed at the bivariate level using Chi-square tests and at the multivariate level us…
M58	Misinformation	Steen, R. G. (2011). Misinformation in the medical literature: What role do error and fraud play?. Journal of medical ethics, 37(8), 498-503.	2011	Journal of Medical Ethics	Media attention to retracted research suggests that a substantial number of papers are corrupted by misinformation. In reality, every paper contains misinformation; at issue is whether the balance of correct versus incorrect information is acceptable. This paper postulates that analysis of retracted research papers can provide insight into medical misinformation, although retracted papers are not…
M65	Misinformation	Fominaya, C. F. (2011). The Madrid bombings and popular protest: misinformation, counter-information, mobilisation and elections after ‘11-M’. Contemporary Social Science, 6(3), 289-307.	2011	Contemporary Social Science	This article analyses the ‘13-M’ flash mob protests following the 11-M terrorist bombings in Madrid and immediately preceding the Spanish General Elections of 14 March 2004. The Governing Popular Party's insistence that ETA were the main suspects, despite contradictory evidence, led to a widespread perception that they were deliberately misleading the public for electoral purposes. This sparked t…
M74	Misinformation	Smith, P., Bansal-Travers, M., O'Connor, R., Brown, A., Banthin, C., Guardino-Colket, S., & Cummings, K. M. (2011). Correcting over 50 years of tobacco industry misinformation. American Journal of Preventive Medicine, 40(6), 690-698.	2011	American Journal of Preventive Medicine	Background In 2006, a U.S. Federal Court ruled that the major domestic cigarette manufacturers were guilty of conspiring to deny, distort, and minimize the hazards of cigarette smoking to the public and ordered corrective statements to correct these deceptions. Purpose This study evaluates the effectiveness of different versions of corrective statements that were proposed to the Court. Methods 23…
F2	Fake News	Marchi, R. (2012). With Facebook, blogs, and fake news, teens reject journalistic “objectivity”. Journal of Communication Inquiry, 36(3), 246-262.	2012	Journal of Communication Inquiry	This article examines the news behaviors and attitudes of teenagers, an understudied demographic in the research on youth and news media. Based on interviews with 61 racially diverse high school students, it discusses how adolescents become informed about current events and why they prefer certain news formats to others. The results reveal changing ways news information is being accessed, new att…
F22	Fake News	Tariq, W., Mehboob, M., Khan, M. A., & Ullah, F. (2012). The impact of social media and social networks on education and students of Pakistan. International Journal of Computer Science Issues (IJCSI), 9(4), 407.	2012	International Journal of Computer Science Issues	The impact of social websites can be good on students but if we have a closer look on the real impact of social networks. Today it is ruining the future and carrier of students. The social networking websites like https://www.linkedin.com, http://www.facebook.com/, https://twitter.com/ and https://www.orkut.com/ etc. are continuously distracting students from their studies. The main focus of stud…
F27	Fake News	Berkowitz, D., & Gutsche Jr, R. E. (2012). Drawing lines in the journalistic sand: Jon Stewart, Edward R. Murrow, and memory of news gone by. Journalism & Mass Communication Quarterly, 89(4), 643-656.	2012	Journalism & Mass Communication Quarterly	In mid-December 2010, The Daily Show host Jon Stewart asked Congress to address the health care needs of 9/11 rescue workers—which it did. Shortly after, the New York Times published an analysis piece comparing Stewart to the legendary broadcaster Edward R. Murrow. This article explores how collective memory of Murrow was used by both mainstream media and the blogosphere to negotiate membership b…
F44	Fake News	Kleinen-von Königslöw, K., & Keel, G. (2012). Localizing The Daily Show: The heute show in Germany. Popular Communication, 10(1-2), 66-79.	2012	Popular Communication	The recent success of the heute show, a German adaptation of The Daily Show with Jon Stewart, on the one hand exemplifies how in this globalized age a foreign format can successfully be adapted to a country's own political, cultural, and journalistic context, even in a genre as notoriously culture-bound as political satire. On the other hand this success story also illustrates how perceptions of …
F47	Fake News	Bruns, A. (2012). Journalists and Twitter: How Australian news organisations adapt to a new medium. Media International Australia, 144(1), 97-107.	2012	Media International Australia	Twitter has developed an increasingly visible presence in Australian journalism, and in the discussion of news. This article examines the positioning of journalists as ‘personal brands’ on Twitter by documenting the visibility of leading personal and institutional accounts during two major political events in Australia: the Rudd/Gillard leadership spill on 23 June 2010, and the day of the subsequ…
F6	Fake News	Day, A., & Thompson, E. (2012). Live from New York, it's the fake news! Saturday Night Live and the (non) politics of parody. Popular Communication, 10(1-2), 170-182.	2012	Popular Communication	Though Saturday Night Live's “Weekend Update” has become one of the most iconic of fake news programs, it is remarkably unfocused on either satiric critique or parody of particular news conventions. Instead, the segment has been shaped by a series of hosts who made a name for themselves by developing distinctive comic personalities. In contrast to more politically invested contemporary programs, …
M1	Misinformation	Lewandowsky, S., Ecker, U. K., Seifert, C. M., Schwarz, N., & Cook, J. (2012). Misinformation and its correction: Continued influence and successful debiasing. Psychological Science in the Public Interest, 13(3), 106-131	2012	Psychological Science in the Public Interest	The widespread prevalence and persistence of misinformation in contemporary societies, such as the false belief that there is a link between childhood vaccinations and autism, is a matter of public concern. For example, the myths surrounding vaccinations, which prompted some parents to withhold immunization from their children, have led to a marked increase in vaccine-preventable disease, as well…
M25	Misinformation	Oeberst, A., & Blank, H. (2012). Undoing suggestive influence on memory: The reversibility of the eyewitness misinformation effect. Cognition, 125(2), 141-159.	2012	Cognition	Presenting inconsistent postevent information about a witnessed incident typically decreases the accuracy of memory reports concerning that event (the misinformation effect). Surprisingly, the reversibility of the effect (after an initial occurrence) has remained largely unexplored. Based on a memory conversion theoretical framework and associated refined assessment strategy, we report three expe…
M41	Misinformation	Appan, R., & Browne, G. J. (2012). The impact of analyst-induced misinformation on the requirements elicitation process. MIS quarterly, 85-106.	2012	MIS quarterly	Information requirements determination (IRD) is concerned with developing accurate requirements for a proposed system, primarily by eliciting information from users and other organizational stakeholders. In this paper we build and test theory concerning a significant threat to the accuracy of information requirements, termed the misinformation effect. Misinformation is distorted, false, or other …
M45	Misinformation	Holliday, R. E., Humphries, J. E., Milne, R., Memon, A., Houlder, L., Lyons, A., & Bull, R. (2012). Reducing misinformation effects in older adults with cognitive interview mnemonics. Psychology and Aging, 27(4), 1191.	2012	Psychology and Aging	We examined the effect of a prior Modified Cognitive Interview on young and older adults' recall of a short film of a staged crime and subsequent reporting of misinformation. Participants viewed the film followed the next day by misinformation presented in a postevent summary. They were then interviewed with either a Modified Cognitive Interview or a control interview followed by a recognition me…
M46	Misinformation	Bryant, A. G., & Levi, E. E. (2012). Abortion misinformation from crisis pregnancy centers in North Carolina. Contraception, 86(6), 752-756.	2012	Contraception	Background This study assessed the accuracy of medical information provided by crisis pregnancy centers in North Carolina. Study Design We performed a secondary data analysis of a “secret shopper survey” performed by a nonprofit organization. Reports from phone calls and visits to crisis pregnancy centers were analyzed for quality and content of medical information provided. Web sites of crisis p…
M52	Misinformation	Foster, J. L., Huthwaite, T., Yesberg, J. A., Garry, M., & Loftus, E. F. (2012). Repetition, not number of sources, increases both susceptibility to misinformation and confidence in the accuracy of eyewitnesses. Acta psychologica, 139(2), 320-326.	2012	Acta Psychologica	Are claims more credible when made by multiple sources, or is it the repetition of claims that matters? Some research suggests that claims have more credibility when independent sources make them. Yet, other research suggests that simply repeating information makes it more accessible and encourages reliance on automatic processes—factors known to change people's judgments. In Experiment 1, people…
M59	Misinformation	Diamond-Smith, N., Campbell, M., & Madan, S. (2012). Misinformation and fear of side-effects of family planning. Culture, health & sexuality, 14(4), 421-433.	2012	Culture, health & sexuality	Fears about the side-effects from family planning are well-documented barriers to use. Many fears are misinformation, while others reflect real experience, and understanding of these is not complete. Using qualitative interviews with women in three countries, this study examines what women feared, how they acquired this knowledge, and how it impacted on decision-making. We aimed to understand whe…
M68	Misinformation	Zhu, B., Chen, C., Loftus, E. F., He, Q., Chen, C., Lei, X., ... & Dong, Q. (2012). Brief exposure to misinformation can lead to long‐term false memories. Applied Cognitive Psychology, 26(2), 301-307.	2012	Applied Cognitive Psychology	Do false memories last? And do they last as long as true ones? This study investigated whether experimentally created false memories would persist for an extended period (one and a half years). A large number of subjects (N = 342) participated in a standard three‐stage misinformation procedure (saw the event slides, read the narrations with misinformation, and then took the memory tests). The ini…
M71	Misinformation	Hess, T. M., Popham, L. E., Emery, L., & Elliott, T. (2012). Mood, motivation, and misinformation: Aging and affective state influences on memory. Aging, Neuropsychology, and Cognition, 19(1-2), 13-34.	2012	Aging, Neuropsychology, and Cognition	Normative age differences in memory have typically been attributed to declines in basic cognitive and cortical mechanisms. The present study examined the degree to which dominant everyday affect might also be associated with age-related memory errors using the misinformation paradigm. Younger and older adults viewed a positive and a negative event, and then were exposed to misinformation about ea…
F12	Fake News	Reilly, I. (2013). From critique to mobilization: The Yes Men and the utopian politics of satirical fake news. International Journal of Communication, 7, 22.	2013	International Journal of Communication	To date, communication and media scholars have placed significant emphasis on the professionalized forms of satirical fake news currently operating within the structures of corporate media, pointing to their continued efforts to counter the prevailing attitudes and perspectives proliferated across the dominant channels of public discourse. What follows is a broader examination of how politically …
F42	Fake News	Bernal, V. (2013). Please forget democracy and justice: Eritrean politics and the powers of humor. American Ethnologist, 40(2), 300-309.	2013	American Ethnologist	Parody possesses a kind of power that realist critique sometimes lacks. I explore why humor is sometimes used as a medium for addressing tragic circumstances and why parody in particular may be especially suited to communicating about dictatorship. The research presented here draws on a long‐term project on Eritrean politics and on websites devoted to Eritrean politics created by Eritreans in dia…
F8	Fake News	Brewer, P. R., Young, D. G., & Morreale, M. (2013). The impact of real news about “fake news”: Intertextual processes and political satire. International Journal of Public Opinion Research, 25(3), 323-343.	2013	International Journal of Public Opinion Research	This study builds on research about political humor, press metacoverage, and intertextuality to examine the effects of news coverage about political satire on audience members. The analysis uses experimental data to test whether news coverage of Stephen Colbert’s Super PAC influenced knowledge and opinion regarding Citizens United, as well as political trust and internal political efficacy. It al…
M15	Misinformation	Morgan III, C. A., Southwick, S., Steffian, G., Hazlett, G. A., & Loftus, E. F. (2013). Misinformation can influence memory for recently experienced, highly stressful events. International journal of law and psychiatry, 36(1), 11-17.	2013	International journal of law and psychiatry	A large body of research has demonstrated that exposure to misinformation can lead to distortions in human memory for genuinely experienced objects or people. The current study examined whether misinformation could affect memory for a recently experienced, personally relevant, highly stressful event. In the present study we assessed the impact of misinformation on memory in over 800 military pers…
M16	Misinformation	Karlova, N. A., & Fisher, K. E. (2013). Plz RT”: A social diffusion model of misinformation and disinformation for understanding human information behaviour. Information Research, 18(1), 1-17.	2013	Information Research	Introduction. People enjoy sharing information, even when they do not believe it. Thus, misinformation (inaccurate information) and disinformation (deceptive information) diffuse throughout social networks, as misinforming and disinforming are varieties of information behaviour. Social media have made such diffusion easier and faster. Many information behaviour models, however, suggest a normativ…
M17	Misinformation	Zimet, G. D., Rosberger, Z., Fisher, W. A., Perez, S., & Stupiansky, N. W. (2013). Beliefs, behaviors and HPV vaccine: correcting the myths and the misinformation. Preventive medicine, 57(5), 414-418.	2013	Preventive medicine	Objective Human papillomavirus (HPV) vaccine uptake in many countries has been sub-optimal. We examine several issues associated with non-vaccination that have received particular attention, including fears about sexual risk compensation, concerns about vaccine safety, inadequate vaccination recommendations by health care providers (HCPs), and distrust due to the perceived “newness” of HPV vaccin…
M28	Misinformation	Shelby, A., & Ernst, K. (2013). Story and science: how providers and parents can utilize storytelling to combat anti-vaccine misinformation. Human vaccines & immunotherapeutics, 9(8), 1795-1801.	2013	Human Vaccines & Immunotherapeutics	With little or no evidence-based information to back up claims of vaccine danger, anti-vaccine activists have relied on the power of storytelling to infect an entire generation of parents with fear of and doubt about vaccines. These parent accounts of perceived vaccine injury, coupled with Andrew Wakefield’s fraudulent research study linking the MMR vaccine to autism, created a substantial amount…
M42	Misinformation	Zhu, B., Chen, C., Loftus, E. F., Lin, C., & Dong, Q. (2013). The relationship between DRM and misinformation false memories. Memory & cognition, 41(6), 832-838.	2013	Memory & Cognition	This research investigated the relationship between false memories induced by two different paradigms (misinformation and Deese–Roediger–McDermott [DRM]). The misinformation effect refers to the phenomenon that a person’s recollection of a witnessed event can be altered after exposure to misleading information about the event. DRM false memory represents the intrusion of words that are semantical…
M48	Misinformation	Lewandowsky, S., Stritzke, W. G., Freund, A. M., Oberauer, K., & Krueger, J. I. (2013). Misinformation, disinformation, and violent conflict: From Iraq and the “War on Terror” to future threats to peace. American Psychologist, 68(7), 487.	2013	American Psychologist	The dissemination and control of information are indispensable ingredients of violent conflict, with all parties involved in a conflict or at war seeking to frame the discussion on their own terms. Those attempts at information control often involve the dissemination of misinformation or disinformation (i.e., information that is incorrect by accident or intent, respectively). We review the way in…
M49	Misinformation	Ma, C. Y., Yau, D. K., Lou, X., & Rao, N. S. (2013). Markov game analysis for attack-defense of power networks under possible misinformation. IEEE Transactions on Power Systems, 28(2), 1676-1686.	2013	IEEE Transactions on Power Systems	Electricity grids are critical infrastructures. They are credible targets of active (e.g., terrorist) attacks since their disruption may lead to sizable losses economically and in human lives. It is thus crucial to develop decision support that can guide administrators in deploying defense resources for system security and reliability. Prior work on the defense of critical infrastructures has typ…
M51	Misinformation	Ost, J., Blank, H., Davies, J., Jones, G., Lambert, K., & Salmon, K. (2013). False memory≠ false memory: DRM errors are unrelated to the misinformation effect. PloS one, 8(4), e57939.	2013	PloS one	The DRM method has proved to be a popular and powerful, if controversial, way to study ‘false memories’. One reason for the controversy is that the extent to which the DRM effect generalises to other kinds of memory error has been neither satisfactorily established nor subject to much empirical attention. In the present paper we contribute data to this ongoing debate. One hundred and twenty parti…
M61	Misinformation	Nguyen, N. P., Yan, G., & Thai, M. T. (2013). Analysis of misinformation containment in online social networks. Computer Networks, 57(10), 2133-2146.	2013	Computer networks	With their blistering expansion in recent years, popular online social sites such as Twitter, Facebook and Bebo, have become not only one of the most effective channels for viral marketing but also the major news sources for many people nowadays. Alongside these promising features, however, comes the threat of misinformation propagation which can lead to undesirable effects. Due to the sheer numb…
F28	Fake News	Schifferes, S., Newman, N., Thurman, N., Corney, D., Göker, A., & Martin, C. (2014). Identifying and verifying news through social media: Developing a user-centred tool for professional journalists. Digital Journalism, 2(3), 406-418.	2014	Digital Journalism	Identifying and verifying new information quickly are key issues for journalists who use social media. This article examines what tools journalists think they need to cope with the growing volume and complexity of news on social media, and what improvements are needed in existing systems. It gives some initial results from a major European Union research project (Social Sensor), involving compute…
F3	Fake News	Balmas, M. (2014). When fake news becomes real: Combined exposure to multiple news sources and political attitudes of inefficacy, alienation, and cynicism. Communication Research, 41(3), 430-454.	2014	Communication Research	This research assesses possible associations between viewing fake news (i.e., political satire) and attitudes of inefficacy, alienation, and cynicism toward political candidates. Using survey data collected during the 2006 Israeli election campaign, the study provides evidence for an indirect positive effect of fake news viewing in fostering the feelings of inefficacy, alienation, and cynicism, t…
M18	Misinformation	Van Damme, I., & Smets, K. (2014). The power of emotion versus the power of suggestion: Memory for emotional events in the misinformation paradigm. Emotion, 14(2), 310.	2014	Emotion	Research has shown that emotional events are remembered better than neutral events, but might also elicit an increase in false memories. The present study was designed to disentangle the influences of valence and arousal on event memory in the misinformation paradigm. Participants were shown six types of photographs (positive with high/low arousal, negative with high/low arousal, ambiguous, neutr…
M23	Misinformation	Blank, H., & Launay, C. (2014). How to protect eyewitness memory against the misinformation effect: A meta-analysis of post-warning studies. Journal of Applied Research in Memory and Cognition, 3(2), 77-88.	2014	Journal of Applied Research in Memory and Cognition	Four decades of research and hundreds of studies speak to the power of post-event misinformation to bias eyewitness accounts of events (see e.g., Loftus’ summary, 2005). A subset of this research has explored if the adverse influence of misinformation on remembering can be undone or at least reduced through a later warning about its presence. We meta-analyzed 25 such post-warning studies (includi…
M29	Misinformation	Kumar, K. K., & Geethakumari, G. (2014). Detecting misinformation in online social networks using cognitive psychology. Human-centric Computing and Information Sciences, 4(1), 14.	2014	Human-centric Computing and Information Sciences	The paper explores the use of concepts in cognitive psychology to evaluate the spread of misinformation, disinformation and propaganda in online social networks. Analysing online social networks to identify metrics to infer cues of deception will enable us to measure diffusion of misinformation. The cognitive process involved in the decision to spread information involves answering four main ques…
M35	Misinformation	Hindin, M. J., McGough, L. J., & Adanu, R. M. (2014). Misperceptions, misinformation and myths about modern contraceptive use in Ghana. J Fam Plann Reprod Health Care, 40(1), 30-35.	2014	J Fam Plann Reprod Health Care	Objective Ghana, like the rest of West Africa, has very low contraceptive prevalence and is one of a few nations that reports declines in contraceptive use over time based on two of the most recent national surveys. Fear of side effects is a leading cause of non-use of contraception, based on national surveys. The objective of this study was to gain a more holistic understanding of why Ghanaian w…
M44	Misinformation	Ecker, U. K., Lewandowsky, S., Fenton, O., & Martin, K. (2014). Do people keep believing because they want to? Preexisting attitudes and the continued influence of misinformation. Memory & cognition, 42(2), 292-304.	2014	Memory & Cognition	Misinformation—defined as information that is initially assumed to be valid but is later corrected or retracted—often has an ongoing effect on people’s memory and reasoning. We tested the hypotheses that (a) reliance on misinformation is affected by people’s preexisting attitudes and (b) attitudes determine the effectiveness of retractions. In two experiments, participants scoring higher and lowe…
M47	Misinformation	Ecker, U. K., Lewandowsky, S., Chang, E. P., & Pillai, R. (2014). The effects of subtle misinformation in news headlines. Journal of experimental psychology: applied, 20(4), 323.	2014	ournal of experimental psychology: applied	Information presented in news articles can be misleading without being blatantly false. Experiment 1 examined the effects of misleading headlines that emphasize secondary content rather than the article’s primary gist. We investigated how headlines affect readers’ processing of factual news articles and opinion pieces, using both direct memory measures and more indirect reasoning measures. Experi…
M62	Misinformation	Bryant, A. G., Narasimhan, S., Bryant-Comstock, K., & Levi, E. E. (2014). Crisis pregnancy center websites: Information, misinformation and disinformation. Contraception, 90(6), 601-605.	2014	Contraception	Objective Most states with 24-h waiting periods prior to abortion provide state resource directories to women seeking abortion. Our objective was to evaluate the information on abortion provided on the websites of crisis pregnancy centers listed in these resource directories. Study design We performed a survey of the websites of crisis pregnancy centers referenced in state resource directories fo…
M64	Misinformation	Hinze, S. R., Slaten, D. G., Horton, W. S., Jenkins, R., & Rapp, D. N. (2014). Pilgrims sailing the Titanic: Plausibility effects on memory for misinformation. Memory & Cognition, 42(2), 305-324.	2014	Memory & Cognition	People rely on information they read even when it is inaccurate (Marsh, Meade, & Roediger, Journal of Memory and Language 49:519–536, 2003), but how ubiquitous is this phenomenon? In two experiments, we investigated whether this tendency to encode and rely on inaccuracies from text might be influenced by the plausibility of misinformation. In Experiment 1, we presented stories containing inaccura…
M67	Misinformation	Wilford, M. M., Chan, J. C., & Tuhn, S. J. (2014). Retrieval enhances eyewitness suggestibility to misinformation in free and cued recall. Journal of Experimental Psychology: Applied, 20(1), 81.	2014	Journal of Experimental Psychology: Applied	Immediately recalling a witnessed event can increase people’s susceptibility to later postevent misinformation. But this retrieval-enhanced suggestibility (RES) effect has been shown only when the initial recall test included specific questions that reappeared on the final test. Moreover, it is unclear whether this phenomenon is affected by the centrality of event details. These limitations make …
M77	Misinformation	Gordon, L. T., & Thomas, A. K. (2014). Testing potentiates new learning in the misinformation paradigm. Memory & cognition, 42(2), 186-197.	2014	Memory & cognition	Retrieval enhanced suggestibility (RES) is the finding that the misinformation effect is exacerbated when a test precedes misleading postevent information (Chan, Thomas, & Bulevich Psychological Science 20: 66–73, 2009). In the present study, we tested three hypotheses relevant to RES. First, we examined whether retrieval of critical details was necessary for the RES effect. Second, we examined w…
F14	Fake News	Frank, R. (2015). Caveat lector: Fake news as folklore. The Journal of American Folklore, 128(509), 315-332.	2015	The Journal of American Folklore	We are awash in words and images that sound and look like real news, but are not. This article considers certain kinds of fake news as a genre of digital folklore and attempts to sort out the differences among fake news hoaxes, pranks, satires, and parodies. It offers examples of each and tries to show how fake news functions as folk political commentary or folk media criticism.
F36	Fake News	Turcotte, J., York, C., Irving, J., Scholl, R. M., & Pingree, R. J. (2015). News recommendations from social media opinion leaders: Effects on media trust and information seeking. Journal of Computer‐Mediated Communication, 20(5), 520-535.	2015	Journal of Computer‐Mediated Communication	Polls show a strong decline in public trust of traditional news outlets; however, social media offers new avenues for receiving news content. This experiment used the Facebook API to manipulate whether a news story appeared to have been posted on Facebook by one of the respondent's real‐life Facebook friends. Results show that social media recommendations improve levels of media trust, and also m…
F40	Fake News	Fernández-Luque, L., & Bau, T. (2015). Health and social media: perfect storm of information. Healthcare informatics research, 21(2), 67-73.	2015	Healthcare Informatics Research	Objectives The use of Internet in the health domain is becoming a major worldwide trend. Millions of citizens are searching online health information and also publishing content about their health. Patients are engaging with other patients in online communities using different types of social media. The boundaries between mobile health, social media, wearable, games, and big data are becoming blu…
F45	Fake News	Carlson, M. (2015). When news sites go native: Redefining the advertising–editorial divide in response to native advertising. Journalism, 16(7), 849-865.	2015	Journalism	Professional journalism’s normative commitment to autonomy has long dictated the separation of editorial functions from advertising. However, the emergent practice of online native advertising complicates this division, resulting in conflicting visions of how journalistic authority should be established for digital news. This study examines reactions to a controversial Church of Scientology nativ…
M31	Misinformation	Weeks, B. E. (2015). Emotions, partisanship, and misperceptions: How anger and anxiety moderate the effect of partisan bias on susceptibility to political misinformation. Journal of Communication, 65(4), 699-719.	2015	Journal of Communication	Citizens are frequently misinformed about political issues and candidates but the circumstances under which inaccurate beliefs emerge are not fully understood. This experimental study demonstrates that the independent experience of two emotions, anger and anxiety, in part determines whether citizens consider misinformation in a partisan or open-minded fashion. Anger encourages partisan, motivated…
M32	Misinformation	Bode, L., & Vraga, E. K. (2015). In related news, that was wrong: The correction of misinformation through related stories functionality in social media. Journal of Communication, 65(4), 619-638.	2015	Journal of Communication	Research on social media and research on correcting misinformation are both growing areas in communication, but for the most part they have not found common ground. This study seeks to bridge these two areas, considering the role that social media may play in correcting misinformation. To do so, we test a new function of Facebook, which provides related links when people click on a link within Fa…
M37	Misinformation	Zollo, F., Novak, P. K., Del Vicario, M., Bessi, A., Mozetič, I., Scala, A., Caldarelli,G., Quattrociocchi, W. (2015). Emotional dynamics in the age of misinformation. PloS one, 10(9), e0138740.	2015	PloS one	According to the World Economic Forum, the diffusion of unsubstantiated rumors on online social media is one of the main threats for our society. The disintermediated paradigm of content production and consumption on online social media might foster the formation of homogeneous communities (echo-chambers) around specific worldviews. Such a scenario has been shown to be a vivid environment for the…
M38	Misinformation	Chandler, C., Fairhead, J., Kelly, A., Leach, M., Martineau, F., Mokuwa, E., ... & Wilkinson, A. (2015). Ebola: limitations of correcting misinformation. The Lancet, 385(9975), 1275-1277.	2015	The Lancet	no abstract
M4	Misinformation	Bessi, A., Coletto, M., Davidescu, G. A., Scala, A., Caldarelli, G., & Quattrociocchi, W. (2015). Science vs conspiracy: Collective narratives in the age of misinformation. PloS one, 10(2), e0118093.	2015	PlOS One	The large availability of user provided contents on online social media facilitates people aggregation around shared beliefs, interests, worldviews and narratives. In spite of the enthusiastic rhetoric about the so called collective intelligence unsubstantiated rumors and conspiracy theories—e.g., chemtrails, reptilians or the Illuminati—are pervasive in online social networks (OSN). In this work…
M53	Misinformation	Hochschild, J. L., & Einstein, K. L. (2015). Do facts matter? Information and misinformation in American politics. Political Science Quarterly, 130(4), 585-624.	2015	Political Science Quarterly	no abstract
M60	Misinformation	Bessi, A., Zollo, F., Del Vicario, M., Scala, A., Caldarelli, G., & Quattrociocchi, W. (2015). Trend of Narratives in the Age of Misinformation. PloS one, 10(8), e0134641.	2015	PLoS One	Social media enabled a direct path from producer to consumer of contents changing the way users get informed, debate, and shape their worldviews. Such a disintermediation might weaken consensus on social relevant issues in favor of rumors, mistrust, or conspiracy thinking—e.g., chem-trails inducing global warming, the link between vaccines and autism, or the New World Order conspiracy. Previous s…
M66	Misinformation	Chen, X., Sin, S. C. J., Theng, Y. L., & Lee, C. S. (2015). Why students share misinformation on social media: Motivation, gender, and study-level differences. The Journal of Academic Librarianship, 41(5), 583-592.	2015	The Journal of Academic Librarianship	The increasing use of social media for information sharing has elevated the need for information literacy (IL) education to prepare students to be effective information creators and communicators. One concern is that students sometimes indiscriminately forward misinformation. Understanding the reasons behind misinformation sharing would help the development of IL intervention strategies. Guided b…
M73	Misinformation	Nyhan, B., & Reifler, J. (2015). Displacing misinformation about events: An experimental test of causal corrections. Journal of Experimental Political Science, 2(1), 81-93.	2015	Journal of Experimental Political Science	Misinformation can be very difficult to correct and may have lasting effects even after it is discredited. One reason for this persistence is the manner in which people make causal inferences based on available information about a given event or outcome. As a result, false information may continue to influence beliefs and attitudes even after being debunked if it is not replaced by an alternate c…
F35	Fake News	Ferrara, E., Varol, O., Davis, C., Menczer, F., & Flammini, A. (2016). The rise of social bots. Communications of the ACM, 59(7), 96-104.	2016	Communications of the ACM	no abstract
F4	Fake News	Khaldarova, I., & Pantti, M. (2016). Fake news: The narrative battle over the Ukrainian conflict. Journalism Practice, 10(7), 891-901.	2016	Journalism Practice	The crisis in Ukraine has accentuated the position of Russian television as the government’s strongest asset in its information warfare. The internet, however, allows other players to challenge the Kremlin’s narrative by providing counter-narratives and debunking distorted information and fake images. Accounting for the new media ecology—through which strategic narratives are created and interpre…
F5	Fake News	Kucharski, A. (2016). Post-truth: Study epidemiology of fake news. Nature, 540(7634), 525.	2016	Nature	no abstract
F52	Fake News	Timmer, J. (2016). Fighting Falsity: Fake News, Facebook, and the First Amendment. Cardozo Arts & Ent. LJ, 35, 669.	2016	Cardozo Arts & Entertainment Law Journal	Fake news stories about the major presidential candidates became widespread on Facebook and elsewhere online in the months leading up to the 2016 presidential election, raising questions o f whether fake news influenced the outcome o f the election. The ease and speed with which false news stories can spread online poses a threat to the efficient functioning o f our democracy, a threat the govern…
F54	Fake News	Humphrey, J. (2016). The Plague of Fake News and the Intersection with Trademark Law. Cybaris Intell. Prop. L. Rev., 8, 126.	2016	Cybaris, an Intellectual Property Law Review
F9	Fake News	Berkowitz, D., & Schwartz, D. A. (2016). Miley, CNN and The Onion: When fake news becomes realer than real. Journalism Practice, 10(1), 1-17.	2016	journalism practice	Following a twerk-heavy performance by Miley Cyrus on the Video Music Awards program, CNN featured the story on the top of its website. The Onion—a fake-news organization—then ran a satirical column purporting to be by CNN's Web editor explaining this decision. Through textual analysis, this paper demonstrates how a Fifth Estate comprised of bloggers, columnists and fake-news organizations worked…
M30	Misinformation	Thorson, E. (2016). Belief echoes: The persistent effects of corrected misinformation. Political Communication, 33(3), 460-480.	2016	Political Communication	Across three separate experiments, I find that exposure to negative political information continues to shape attitudes even after the information has been effectively discredited. I call these effects “belief echoes.” Results suggest that belief echoes can be created through an automatic or deliberative process. Belief echoes occur even when the misinformation is corrected immediately, the “gold …
F1	Fake News	Allcott, H., & Gentzkow, M. (2017). Social media and fake news in the 2016 election. Journal of Economic Perspectives, 31(2), 211-36.	2017	Journal of Economic Perspectives	No abstract
F13	Fake News	Persily, N. (2017). The 2016 US Election: Can democracy survive the internet?. Journal of democracy, 28(2), 63-76.	2017	Journal of democracy	The 2016 presidential election represents the latest chapter in the disintegration of the legacy institutions that had set bounds for U.S. politics in the postwar era. It is tempting (and in many ways correct) to view the Donald Trump campaign as unprecedented in its breaking of established norms of politics. Yet this type of campaign could only be successful because established institutions—espe…
F16	Fake News	Polletta, F., & Callahan, J. (2017). Deep stories, nostalgia narratives, and fake news: Storytelling in the Trump era. American Journal of Cultural Sociology, 5(3), 392-408.	2017	American Journal of Cultural Sociology	Characterizing Trump supporters either as “duped” by Fox News or as speaking from their lived experience misses the fact that both are true. We draw on scholarship on narrative and on the media to trace the ways in which elite-produced stories simultaneously reflect and forge a political common sense. We argue that narrative’s allusiveness (the fact that stories work by calling up other stories) …
F17	Fake News	Rochlin, N. (2017). Fake news: belief in post-truth. Library Hi Tech, 35(3), 386-392.	2017	Library Hi Tech	Purpose The purpose of this paper is to illustrate that the current efforts to combat the epidemic of fake news – compiling lists of fake news sites, flagging stories as having been disputed as “fake,” downloading plug-ins to detect fake news – show a fundamental misunderstanding of the issue. Design/methodology/approach This paper explores the plummeting believability ratings in conventional new…
F20	Fake News	Paul, P. V. (2017). Fake news, alternative facts, post-truths, misinformation, misinterpretation—and other challenges associated with knowledge generation. American annals of the deaf, 162(1), 3-7.	2017	American Annals of the Deaf	no abstract
F49	Fake News	Pitruzzella, G. (2017). Italy's Antitrust Chief: The Case For Regulating Fake News Online. New Perspectives Quarterly, 34(4), 32-34.	2017	New Perspectives Quarterly	no abstract
F50	Fake News	Krug, G. J. (2017). Fake information, fake warfare, and real destabilizations of news. Russian Journal of Communication, 9(2), 201-203.	2017	Russian Journal of Communication	no abstract
F51	Fake News	Holan, A. (2017). The Media's Definition of Fake News vs. Donald Trump's. First Amend. L. Rev., 16, 121.	2017	First Amend. L. Rev	no abstract
F55	Fake News	Messenger, A. (2017). The Epistemic and Moral Dimensions of Fake News and the First Amendment. First Amend. L. Rev., 16, 328.	2017	First Amen. L. rev.	no abstract
F57	Fake News	Downman, S. (2017). When a community rises up against fake news: The Change Makers’ Project. Ethical Space: the international journal of communication ethics, 14(4), 4-10.	2017	Ethical Space: the international journal of communication ethics	Fake news may have only recently become the subject of news headlines but it has long been a problem in local news coverage. This study ex- amines the impact of fake news on a low socio- economic, multicultural, hyperlocal community in Logan City, south of Brisbane, Australia. It ex- amines the blurriness between fake news and poor journalism. However, more importantly it presents a case study of…
F58	Fake News	Commisso, C. (2017). The Post-Truth Archive: Considerations for Archiving Context in Fake News Repositories. Preservation, Digital Technology & Culture, 46(3), 99-102.	2017	Preservation, Digital Technology & Culture	Our current media environment is in a state of post-truth disruption: fake news is rampant, trusted media sources are viewed as partisan and suspect, and emotional appeal and personal belief hold more influence than objective facts. While many information professions are focused on combatting fake news through media literacy education, policy development, and advancements in search and social med…
F59	Fake News	Ugwuanyi, S. U. (2017). Influence of Fake News on Public Perception of Nigeria’s Online Newspapers. Global Journal of Human-Social Science Research.	2017	Global Journal of Human-Social Science Research	The online newspaper is increasingly taking the place of the hardcopy newspaper. As readers switch to popular online newspapers, it behoves the internet-based medium to live up to, and better play, the very important function to the society carried out by the hardcopy newspapers. But the increasing cases of fake news in the blogosphere seem likely to detract from the credibility which many place …
F60	Fake News	SIRAJUDEEN, S. M., AZMI, N. F. A., & ABUBAKAR, A. I. (2017). ONLINE FAKE NEWS DETECTION ALGORITHM. Journal of Theoretical & Applied Information Technology, 95(17).	2017	Journal of Theoretical & Applied Information Technology	The widespread of online hoax news is increasing rapidly, especially with the vast number of Microblogging sites allowing disseminating distasteful content. This has become vigorous and nearly unstoppable now. Spreading online fake news has been identified as one of the major top concern of online abuse. Due to the difficulty in preventing and evaluating what does fake news contain prior to publi…
F61	Fake News	Noor, F. A. (2017). How “fake news” was a tool of nineteenth century colonialism and conquest. Media Asia, 44(2), 88-93.	2017	Media Asia	no abstract
F62	Fake News	Yee, A. (2017). Post-Truth Politics & Fake News in Asia. Global Asia, 12(2), 66-71.	2017	Global Asia	no abstract
F63	Fake News	Hernandez, C. (2017). Fake News and Information Literacy: Creating Resources to Develop Source Evaluation Skills at the University of Oregon Libraries. OLA Quarterly, 23(1), 13-15.	2017	OLA Quarterly	no abstract
F64	Fake News	Riggins, J. A. (2017). Law Student Unleashes Bombshell Allegation You Won't Believe: Fake News as Commercial Speech. Wake Forest L. Rev., 52, 1313.	2017	Wake Forest Law Review	no abstract
F65	Fake News	Juhasz, A. (2017). A Preservationist’s Guide to# 100hardtruths-# fakenews: One Fake News Preserve. Preservation, Digital Technology & Culture, 46(3), 103-108.	2017	Preservation, Digital Technology & Cultur	The author created a media project, #100hardtruths-#fakenews, to collect and preserve media relating to fake news that was generated during the first 100 days of the U. S. Presidency of Donald J. Trump. Her resulting website chronicles fake news as well as the many media responses to it. This article describes the author’s construction of the site, characteristics of the posts, and ways in which …
F66	Fake News	Rowe, S. B., & Alexander, N. (2017). On Post-Truth, Fake News, and Trust. Nutrition Today, 52(4), 179-182.	2017	Nutrition Today	The evolution of health, nutrition, and other science communication in an increasingly digital environment has been well reported in recent years. More immediately, it has been suggested that the world has entered a “post-truth” era in which nutrition and other communicators face growing challenges in delivering balanced, accurate, and credible information. Public trust in and understanding of th…
F67	Fake News	Quinn, A. (2017). Fake News, False Beliefs, and the Need for Truth in Journalism. International Journal of Applied Philosophy, 31(1), 21-29.	2017	International Journal of Applied Philosophy	Many of U.S. President Donald Trump’s business interests—and those of his family and close associates—either conflict or could conflict with his position as the country’s top elected official. Despite concerns about the vitality of the journalism industry, these actual or potential conflicts have been reported in great detail across a number of journalism platforms. More concerning, however, are …
F68	Fake News	Farooq, G. (2017). Politics of Fake News: How WhatsApp Became a Potent Propaganda Tool in India. Media Watch, 9(1), 106-117.	2017	Media Watch	While the Internet and multimedia applications have made it easy to produce and spread media, they have also made it possible to distribute fake news to masses. With over 200 million active users in India and growing, WhatsApp's reach and features make it a top choice to spread fake news.This not only influences public opinion in India but has also sometimes created panic and incited to violence.…
F7	Fake News	Mihailidis, P., & Viotty, S. (2017). Spreadable spectacle in digital culture: Civic expression, fake news, and the role of media literacies in “post-fact” society. American Behavioral Scientist, 61(4), 441-454.	2017	American Behavioral Scientist	This article explores the phenomenon of spectacle in the lead up and immediate aftermath of the 2016 U.S. presidential election. Through the spread of misinformation, the appropriation of cultural iconography, and the willing engagement of mainstream media to perpetuate partisan and polarizing information, the proliferation of populist rhetoric, polarizing views, and vitriolic opinions spread. Re…
F70	Fake News	Emanuelson Jr, E. (2017). FAKE LEFT, FAKE RIGHT: PROMOTING AN INFORMED PUBLIC IN THE ERA OF ALTERNATIVE FACTS. J. ECON. PERSP, 211, 232.	2017	Administrative Law Review	no abstract
F71	Fake News	Hundley, A. C. (2017). Fake News and the First Amendment: How False Political Speech Kills the Marketplace of Ideas. Tul. L. Rev., 92, 497.	2017	Tulane Law review	no abstract
F72	Fake News	Wiggins, B. E. (2017). Navigating an Immersive Narratology: Factors to Explain the Reception of Fake News. International Journal of E-Politics (IJEP), 8(3), 16-29.	2017	International Journal of E-Politics	In direct response to the rise in fake news as a socio-cultural and political phenomenon, this article presents an analysis of the factors that may help to explain the reception of fake news. In addition, recent pronouncements made by the Trump White House seem to challenge the nature of an objective truth. An immersive narratology emphasizes that different universes of discourse can intermingle …
F73	Fake News	Vojak, B. (2017). Fake News: The Commoditization of Internet Speech. California Western International Law Journal, 48(1), 5.	2017	California Western International Law Journal	no abstract
F74	Fake News	Gonzalez, A., & Schulz, D. (2017). Helping Truth with Its Boots: Accreditation as an Antidote to Fake News. Yale LJF, 127, 315.	2017	Yale Law Journal Forum	A generally accepted, objective way to differentiate reliable generators of accurate information from purveyors of “fake news” would take significant positive steps toward combating its spread. Other spheres of our economy successfully use private accreditation systems to distinguish quality products and services from those that are inferior or fraudulent. This Essay considers online platforms’ c…
F75	Fake News	Pearson, M. (2017). Teaching Media Law in a Post-truth Context: Strategies for Enhancing Learning about the Legal Risks of Fake News and Alternative Facts. Asia Pacific Media Educator, 27(1), 17-26.	2017	Asia Pacific Media Educator	Much has been written about the ethics of so-called ‘fake news’ and ‘alternative’ facts in a ‘post-truth’ era, but few have explored the legal implications of these and the flow-on to education in media law. This article suggests that there are clear legal risks for journalists adopting the hallmark practices of ‘fake news’—particularly in linking identifiable individuals to reputationally damagi…
F76	Fake News	Calvert, C., & Vining, A. (2017). Filtering Fake News through a Lens of Supreme Court Observations and Adages. First Amend. L. Rev., 16, 153.	2017	First Amendment Law Review	This Essay analyzes multiple issues affecting fake news. It does so through a prism of seven observations by the U.S. Supreme Court concerning the First Amendment, free speech , and other matters. The Court’s wisdom in these quotations provides propitious points of entrée for exploring how to address and remedy problems many fear fake news causes. The Essay concludes that because fake news will n…
M14	Misinformation	Berinsky, A. J. (2017). Rumors and health care reform: experiments in political misinformation. British Journal of Political Science, 47(2), 241-262.	2017	British Journal of Political Science	This article explores belief in political rumors surrounding the health care reforms enacted by Congress in 2010. Refuting rumors with statements from unlikely sources can, under certain circumstances, increase the willingness of citizens to reject rumors regardless of their own political predilections. Such source credibility effects, while well known in the political persuasion literature, have…
M24	Misinformation	Van der Linden, S., Leiserowitz, A., Rosenthal, S., & Maibach, E. (2017). Inoculating the public against misinformation about climate change. Global Challenges, 1(2), 1600008.	2017	Global Challenges	Effectively addressing climate change requires significant changes in individual and collective human behavior and decision‐making. Yet, in light of the increasing politicization of (climate) science, and the attempts of vested‐interest groups to undermine the scientific consensus on climate change through organized “disinformation campaigns,” identifying ways to effectively engage with the publi…
M50	Misinformation	Swire, B., Berinsky, A. J., Lewandowsky, S., & Ecker, U. K. (2017). Processing political misinformation: comprehending the Trump phenomenon. Royal Society Open Science, 4(3), 160802.	2017	Royal Society Open Science	This study investigated the cognitive processing of true and false political information. Specifically, it examined the impact of source credibility on the assessment of veracity when information comes from a polarizing source (Experiment 1), and effectiveness of explanations when they come from one's own political party or an opposition party (Experiment 2). These experiments were conducted prio…
M54	Misinformation	Cook, J., Lewandowsky, S., & Ecker, U. K. (2017). Neutralizing misinformation through inoculation: Exposing misleading argumentation techniques reduces their influence. PloS one, 12(5), e0175799.	2017	PLoS One	Misinformation can undermine a well-functioning democracy. For example, public misconceptions about climate change can lead to lowered acceptance of the reality of climate change and lowered support for mitigation policies. This study experimentally explored the impact of misinformation about climate change and tested several pre-emptive interventions designed to reduce the influence of misinform…
M63	Misinformation	Kahne, J., & Bowyer, B. (2017). Educating for democracy in a partisan age: Confronting the challenges of motivated reasoning and misinformation. American Educational Research Journal, 54(1), 3-34.	2017	American Educational Research Journal	This article investigates youth judgments of the accuracy of truth claims tied to controversial public issues. In an experiment embedded within a nation- ally representative survey of youth ages 15 to 27 (N = 2,101), youth were asked to judge the accuracy of one of several simulated online posts. Consistent with research on motivated reasoning, youth assessments depended on (a) the alignment of t…
M69	Misinformation	Lewandowsky, S., Ecker, U. K., & Cook, J. (2017). Beyond misinformation: Understanding and coping with the “post-truth” era. Journal of Applied Research in Memory and Cognition, 6(4), 353-369.	2017	Journal of Applied Research in Memory and Cognition	The terms “post-truth” and “fake news” have become increasingly prevalent in public discourse over the last year. This article explores the growing abundance of misinformation, how it influences people, and how to counter it. We examine the ways in which misinformation can have an adverse impact on society. We summarize how people respond to corrections of misinformation, and what kinds of correc…
M75	Misinformation	Ecker, U. K., Hogan, J. L., & Lewandowsky, S. (2017). Reminders and repetition of misinformation: Helping or hindering its retraction?. Journal of Applied Research in Memory and Cognition, 6(2), 185-192.	2017	ournal of Applied Research in Memory and Cognition	People frequently rely on information even after it has been retracted, a phenomenon known as the continued-influence effect of misinformation. One factor proposed to explain the ineffectiveness of retractions is that repeating misinformation during a correction may inadvertently strengthen the misinformation by making it more familiar. Practitioners are therefore often encouraged to design corre…
M78	Misinformation	Chan, M. P. S., Jones, C. R., Hall Jamieson, K., & Albarracín, D. (2017). Debunking: A meta-analysis of the psychological efficacy of messages countering misinformation. Psychological science, 28(11), 1531-1546.	2017	Psychological Science	This meta-analysis investigated the factors underlying effective messages to counter attitudes and beliefs based on misinformation. Because misinformation can lead to poor decisions about consequential matters and is persistent and difficult to correct, debunking it is an important scientific and public-policy goal. This meta-analysis (k = 52, N = 6,878) revealed large effects for presenting misi…
